# Supplementary material
Source: HighWire-hosted journal article supplement (https://bmjopen.bmj.com/content/13/12/e074788)
Supplement: inline-supplementary-material-5 [file inline-supplementary-material-5.pdf]

**Supplementary file 5. Mini-checklist (MiChe)**

| MiChe items                                                                            | Description                                                                                                                                                                      | Assessment options                         |
|----------------------------------------------------------------------------------------|----------------------------------------------------------------------------------------------------------------------------------------------------------------------------------|--------------------------------------------|
| 1. Identification of key recommendations and comprehensibility                         | The guideline is organized in such a way that it is generally easy to understand, and the key recommendations are easy to identify.                                              | Yes<br>To some extent<br>No                |
| 2. Specification of the guideline's target audiences and scope                         | The target users are clearly defined, as are the target situations in which the guideline is to be applied.                                                                      | Yes<br>To some extent<br>No                |
| 3. Specification of the objectives and the target population                           | The background and purpose of the guideline and the patients for whom it is to be applied are clearly defined.                                                                   | Yes<br>To some extent<br>No                |
| 4. Independence and potential conflicts of interests                                   | The developers of the guideline are all identified by name. Their conflicts of interest are declared, and the financial independence of the guideline issuing body is documented | Yes<br>To some extent<br>No                |
| 5. Systematic search for evidence and selection criteria                               | The search for evidence was performed systematically, and the criteria for the selection of evidence are described.                                                              | Yes<br>To some extent<br>No                |
| 6. Unambiguity of recommendation                                                       | The recommendations are clear, and their derivation from the evidence is explicit                                                                                                | Yes<br>To some extent<br>No                |
| 7. Different treatment options according to potential benefits, side effects and risks | Multiple management options are presented with a discussion of their utility, side effects, and risks                                                                            | Yes<br>To some extent<br>No                |
| 8. Information on update procedures                                                    | The date of issuance of the guideline and its expiration date are clearly indicated                                                                                              | Yes<br>To some extent<br>No                |
| Overall assessment                                                                     | Likert scale                                                                                                                                                                     | From 1 (very good) to 7 (very poor)        |
| Recommendation for further use                                                         |                                                                                                                                                                                  | Yes<br>Yes, with certain reservation<br>no |

Translated and adapted from Semlitsch T, Jeitler K, Kopp IB, Siebenhofer A. Entwicklung einer praktikablen Mini-Checkliste zur Bewertung der methodischen Leitlinienqualität. Zeitschrift für Evidenz, Fortbildung und Qualität im Gesundheitswesen. 2014;108(5–6):299–312.
